# Supplementary material for: Doubly-linked 1D coordination polymers derived from 2 ∶ 2 metallamacrocyclic Ni(ii) complexes with bipodal acylthiourea and exo-bidentate N-donor bridging ligands: toward potentially selective chemical sensors?
Source: Royal Society of Chemistry journal article supplement (doi:10.1039/b509727d), 2005-01-01
Supplement: b509727d.pdf [file b509727d.pdf]

**Doubly-linked 1D coordination polymers derived from 2 : 2  
metallamacrocyclic Ni(II) complexes with bipodal  
acylthiourea and *exo*-bidentate *N*-donor bridging ligands:  
toward potentially selective chemical sensors?**

Oren Hallale <sup>a</sup>, Susan A. Bourne <sup>\*a</sup> and Klaus R. Koch <sup>\*b</sup>

<sup>a</sup> Department of Chemistry, University of Cape Town, Rondebosch 7701, South Africa.  
E-mail: [xraysue@science.uct.ac.za](mailto:xraysue@science.uct.ac.za); Fax: 27 21 689 7499; Tel: 27 21 650 2653

<sup>b</sup> Department of Chemistry, University of Stellenbosch, Private Bag XI, Matieland 7602,  
South Africa. E-mail: [krk@sun.ac.za](mailto:krk@sun.ac.za); Fax: 27 21 808 3360; Tel: 27 21 808 3020

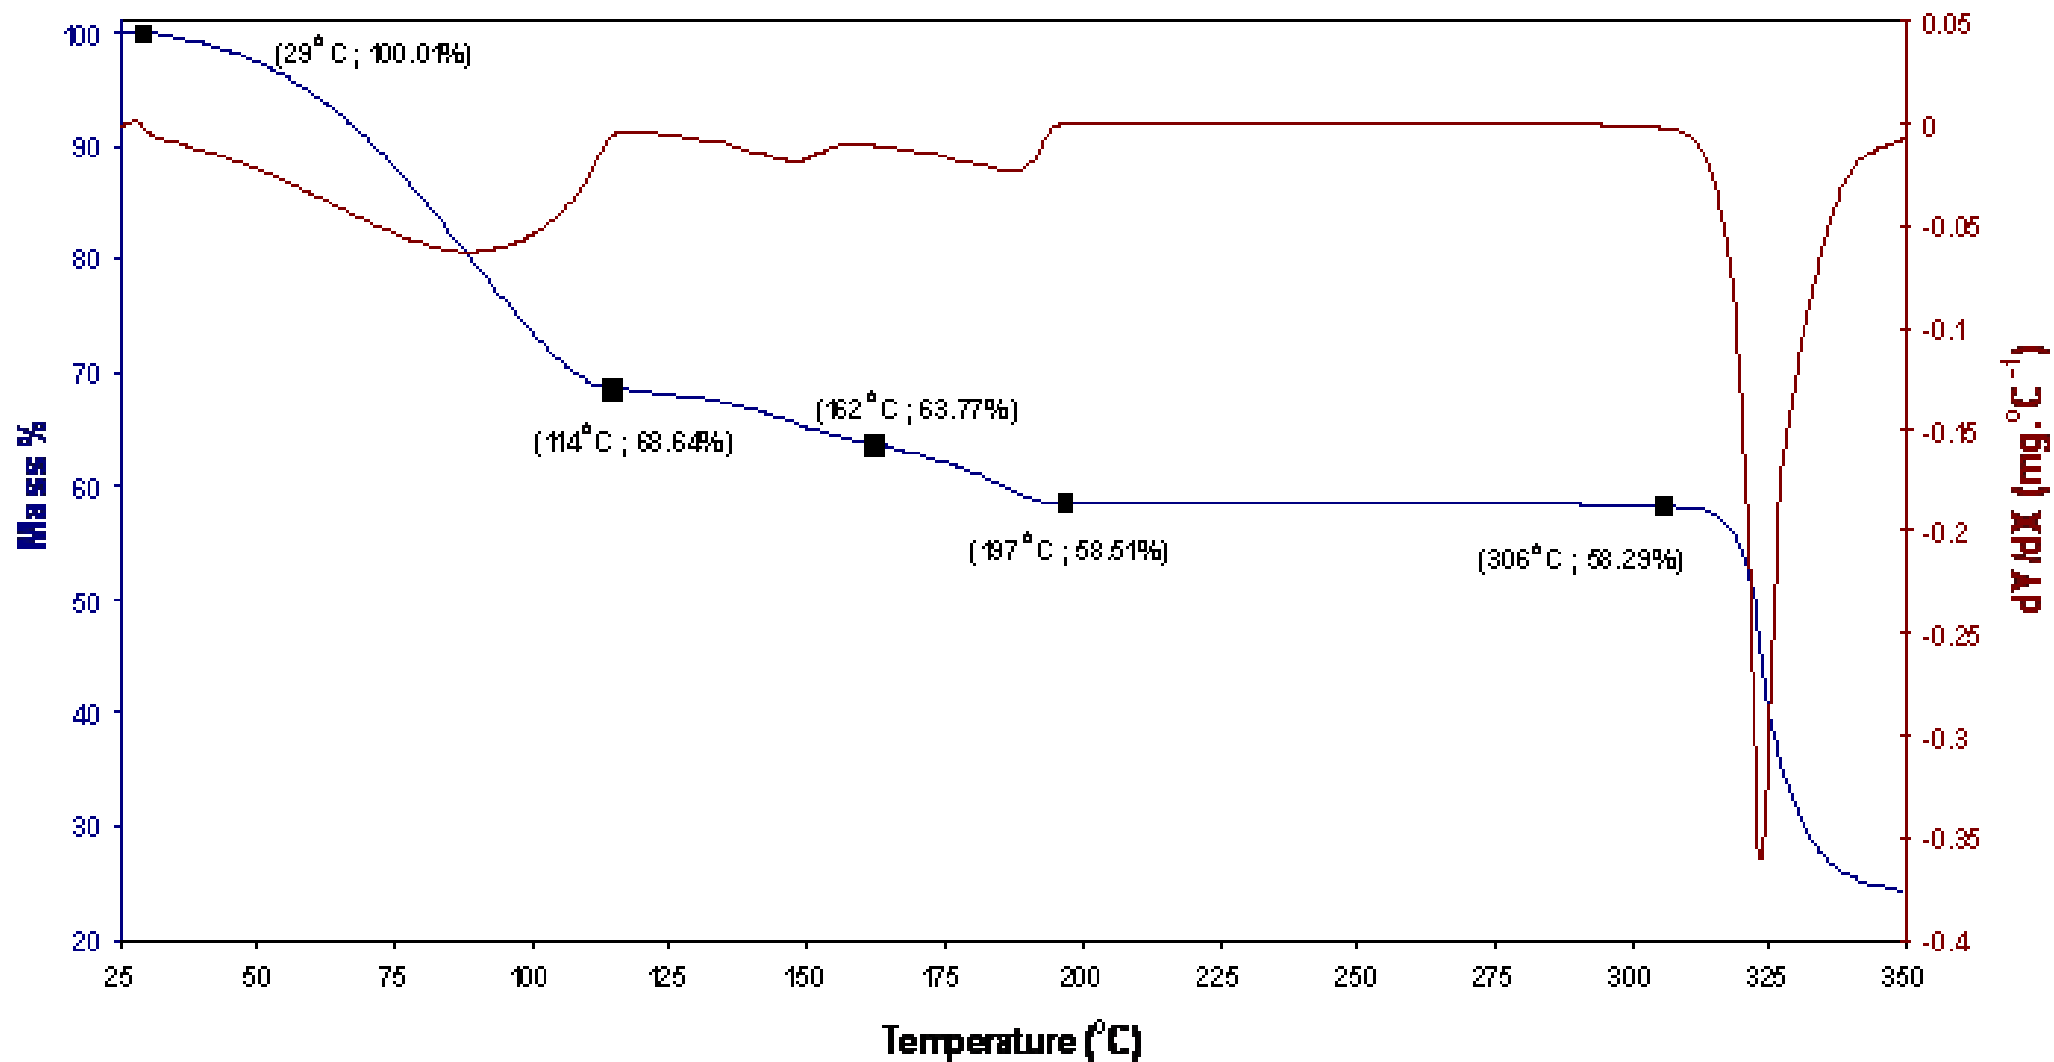

TGA trace for  $\{cis-[Ni(I-Et-S,O)(pyra-N,N')]_2\}_n$  (**2**) with 1<sup>st</sup> derivative curve indicated

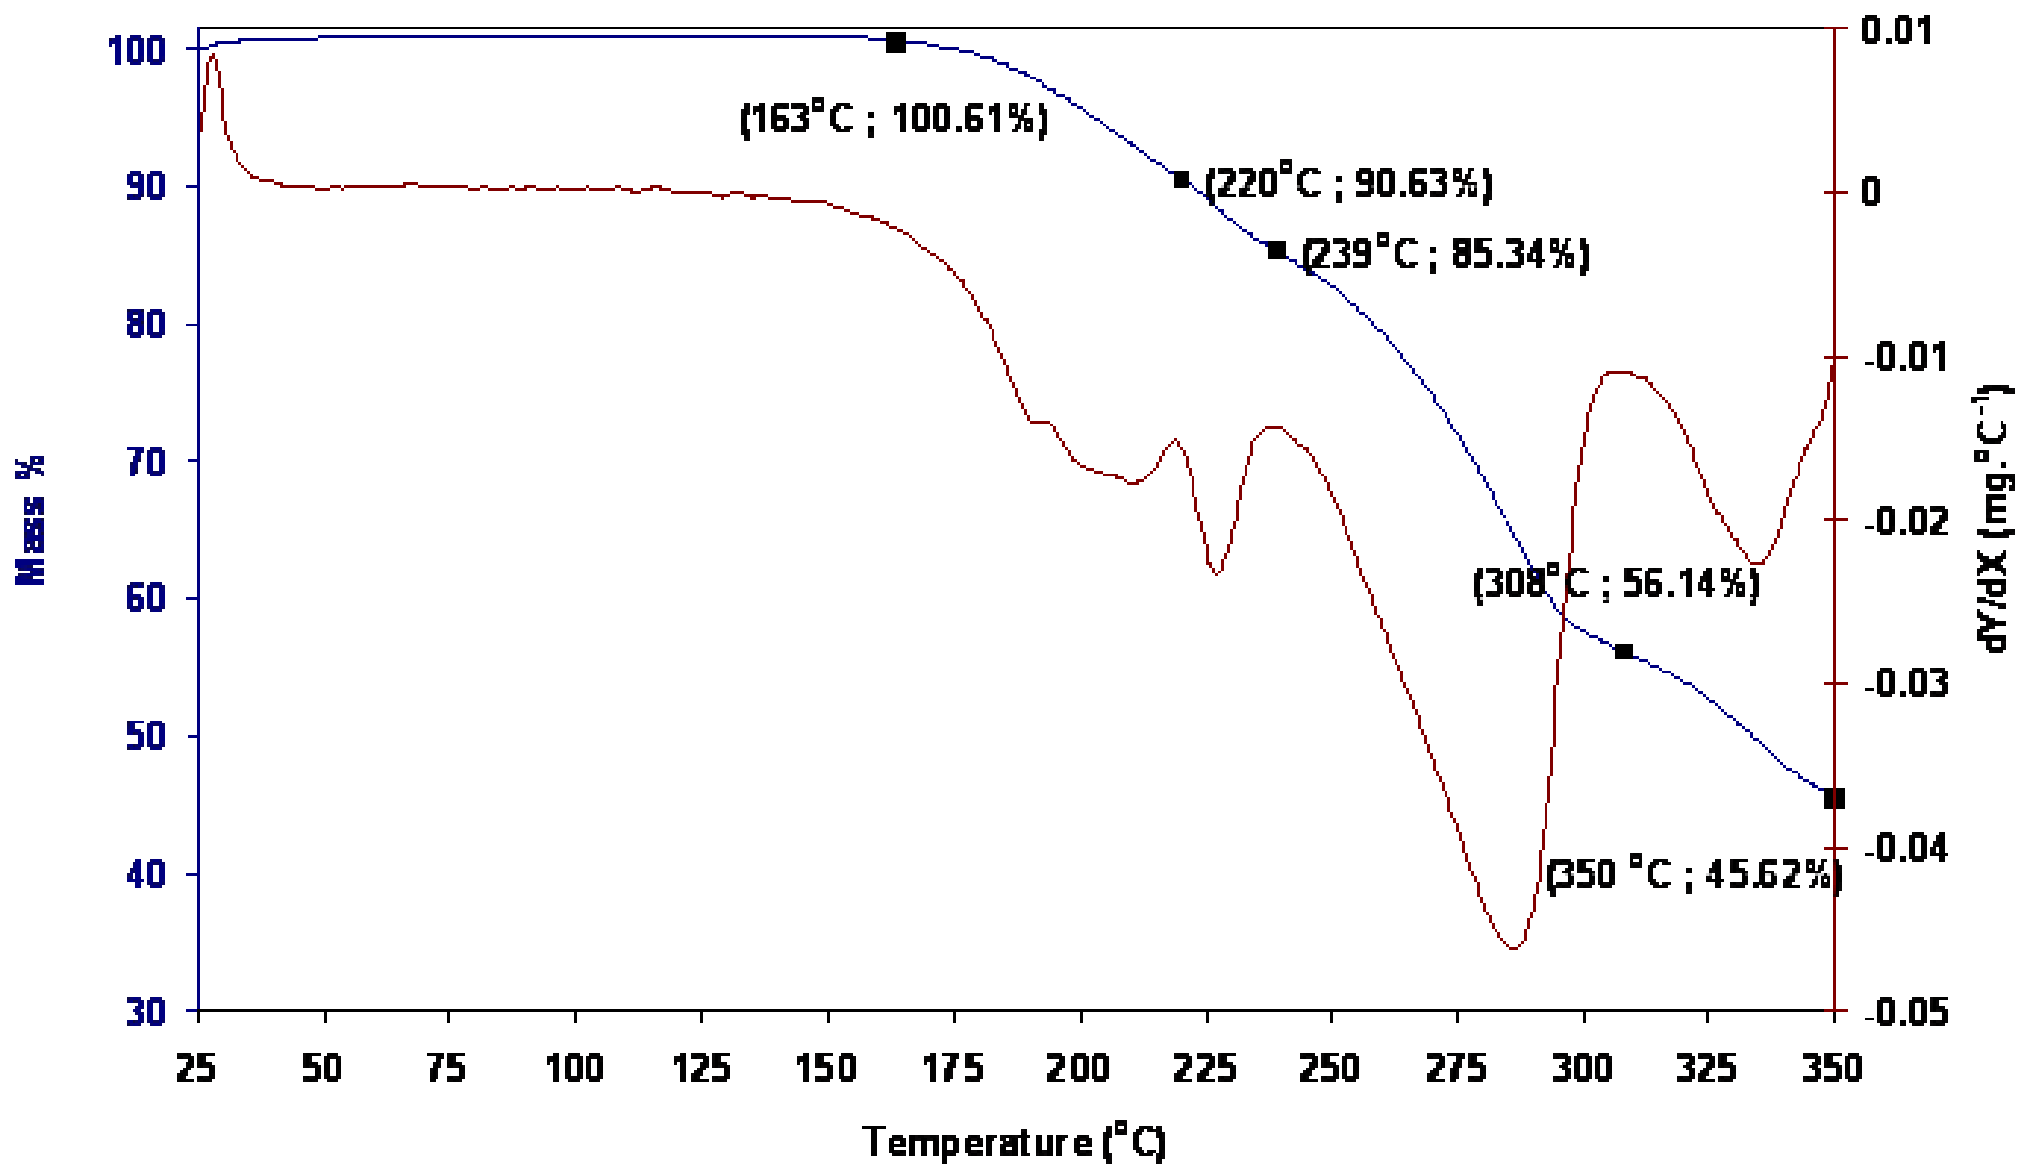

TGA trace for  $\{cis-[Ni(I-Et-S,O)(bipy-N,N')]_2\}_n$  (3) with 1<sup>st</sup> derivative curve indicated.

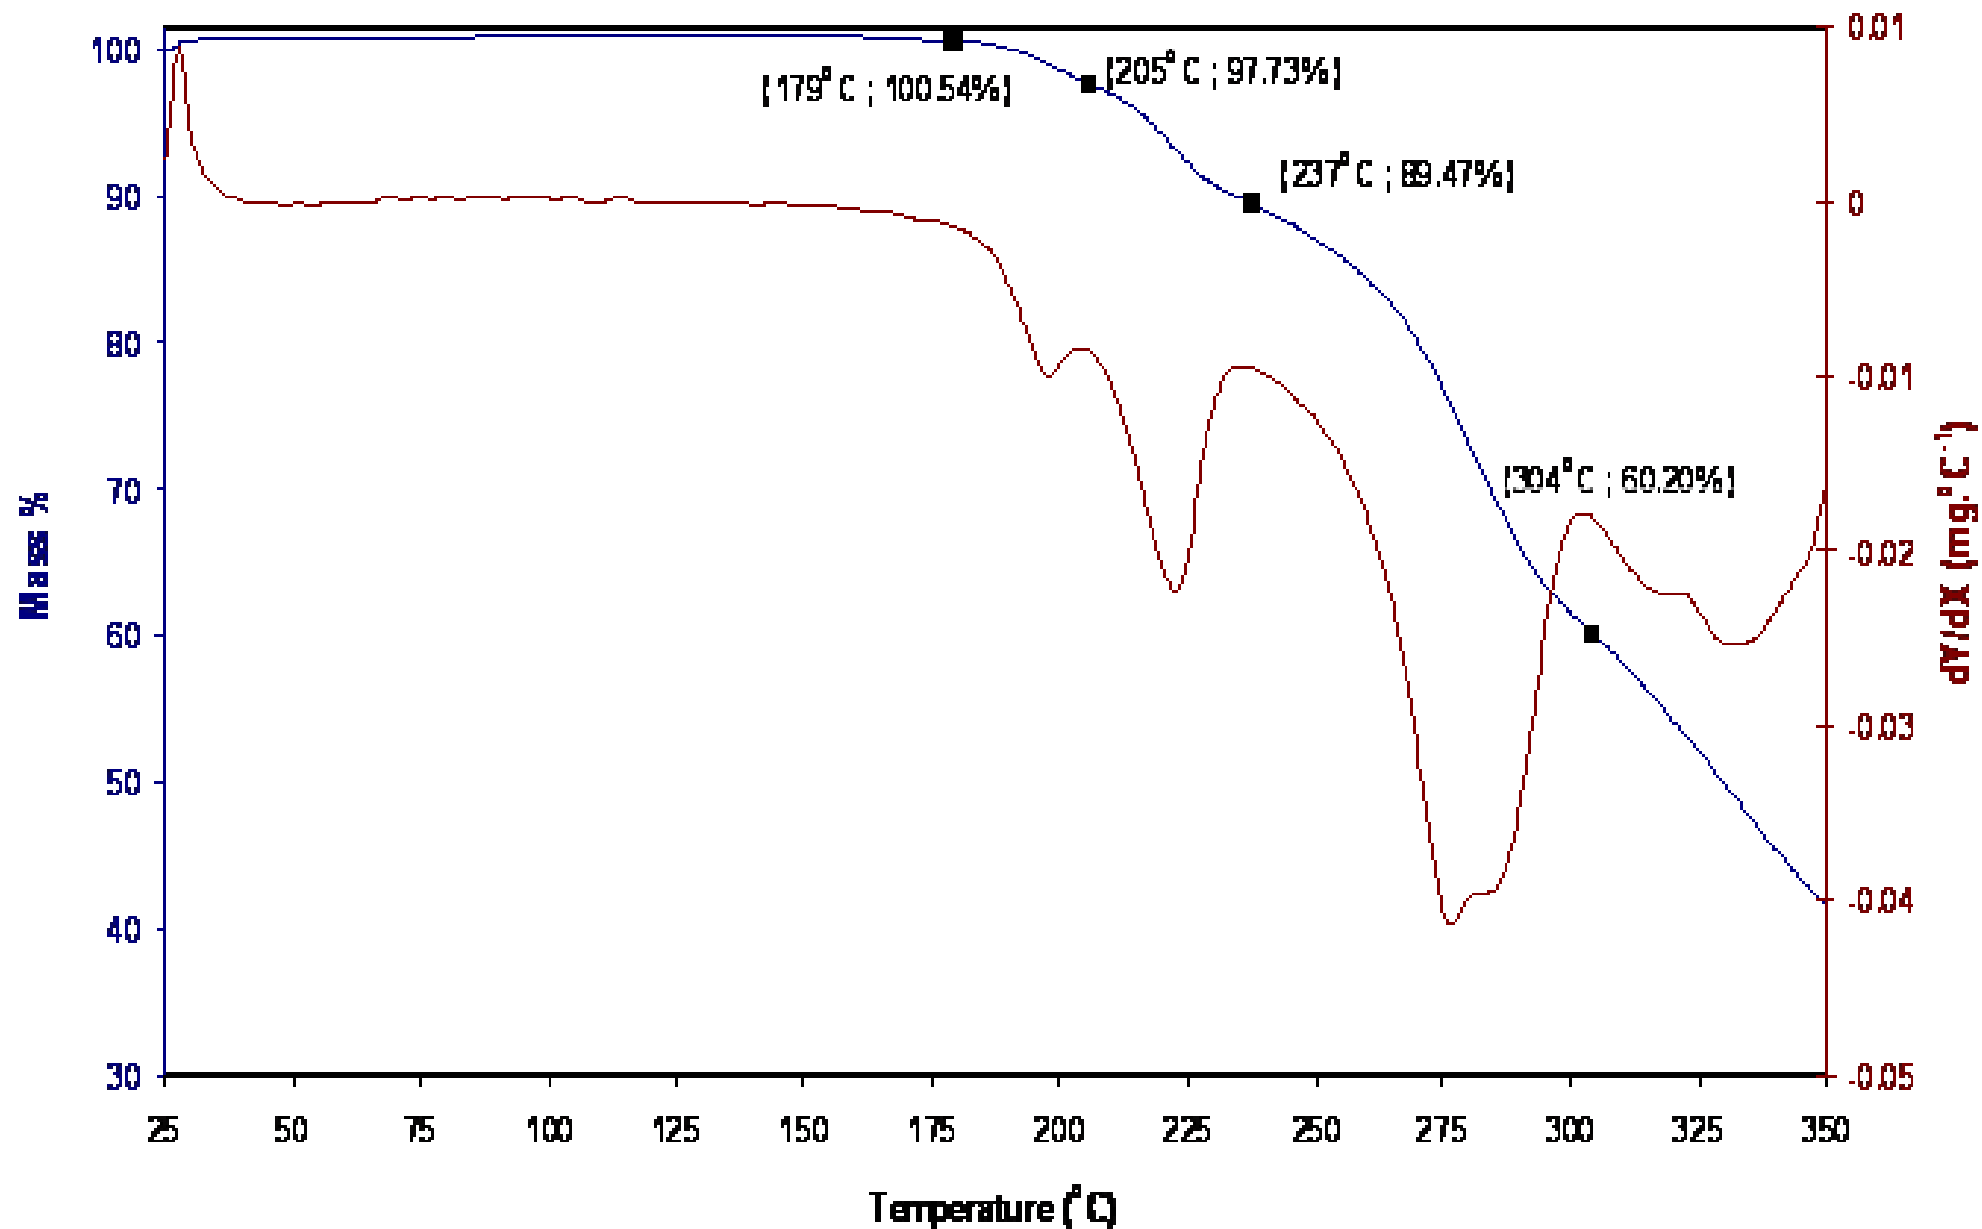

TGA trace for  $(cis-[Ni(I-Et-S,O)(BPE-N,N')]_2)_n$  (4) with 1<sup>st</sup> derivative curve indicated.

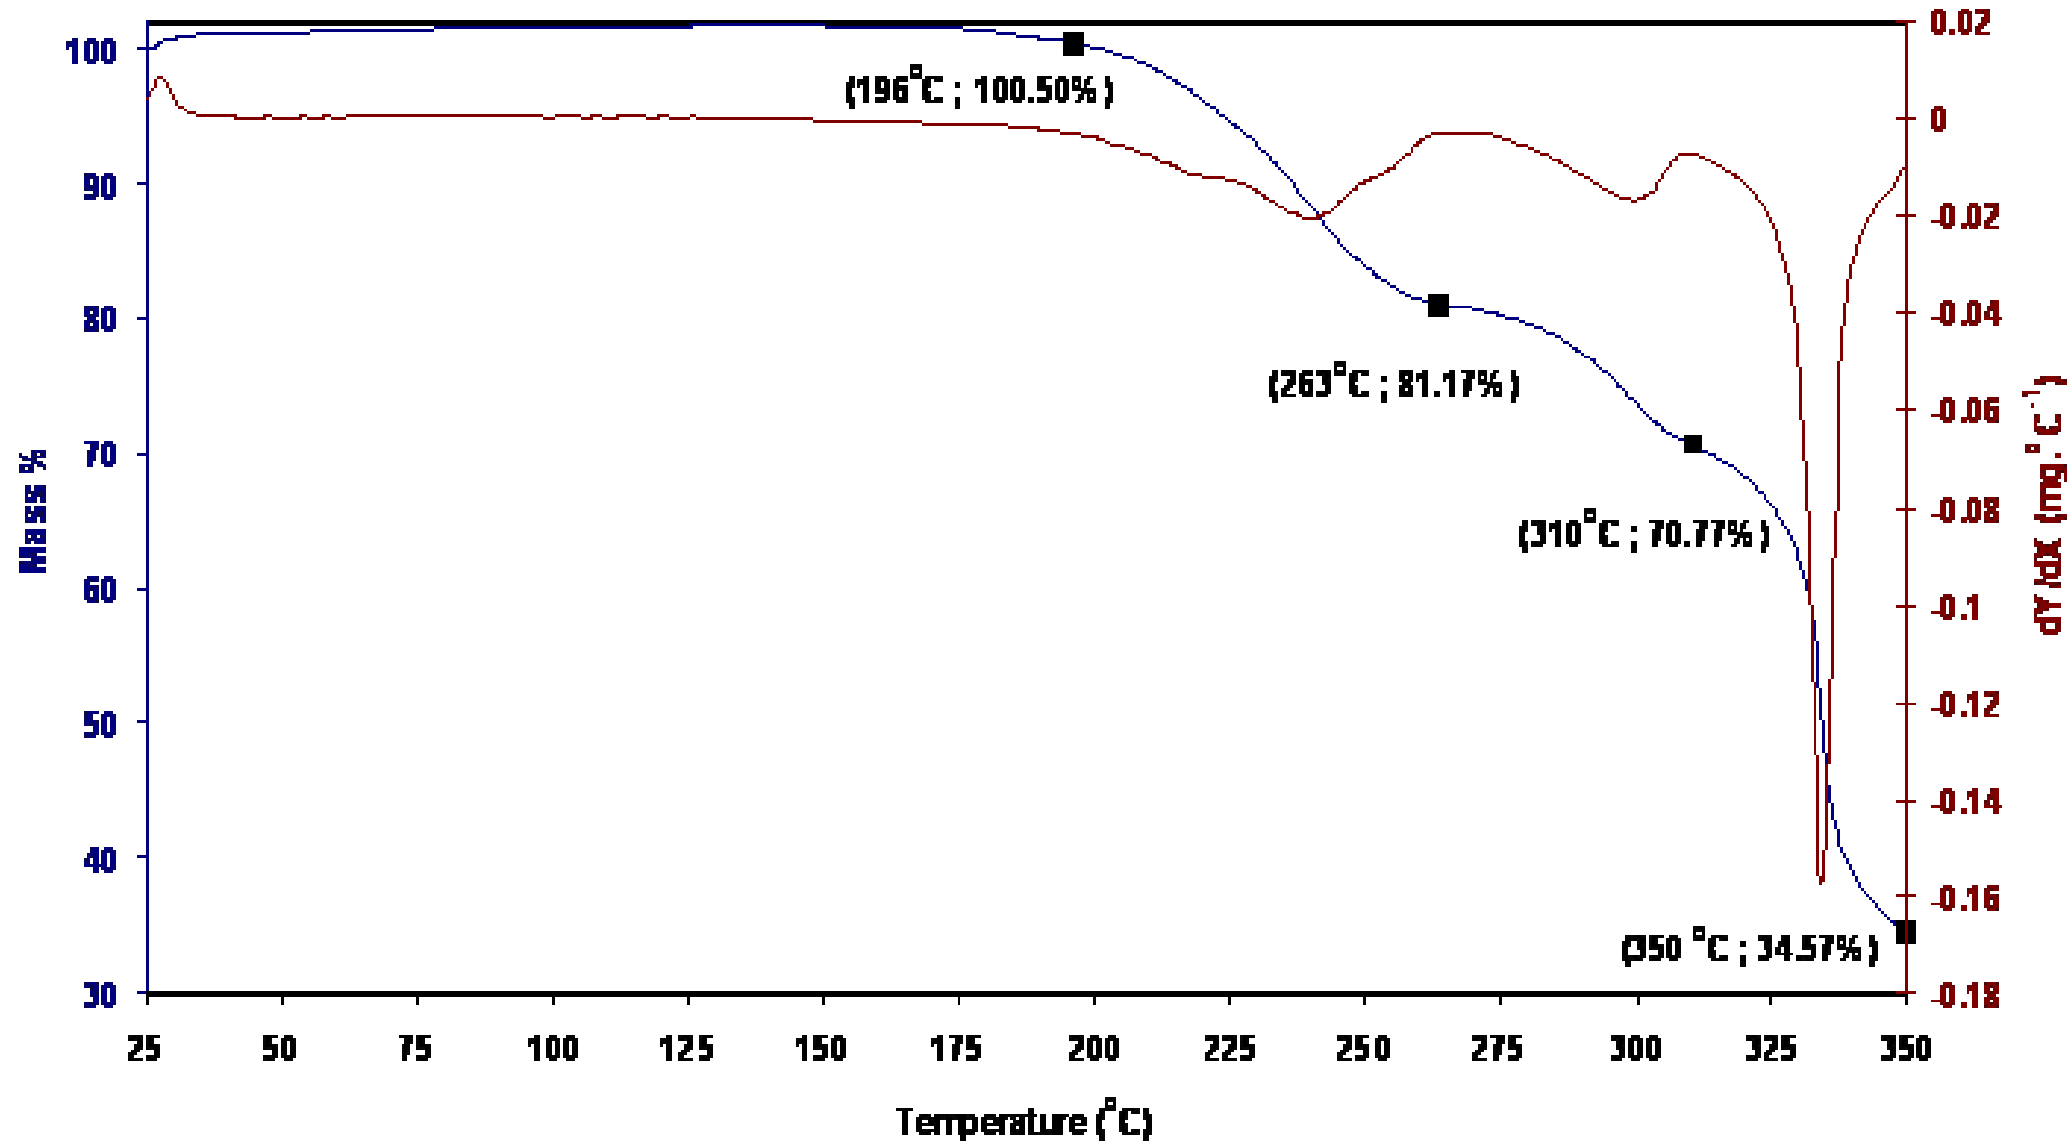

TGA trace for  $\{cis-[Ni(I-Et-S,O)(DPE-N,N)]_2\}_n$  (**5**) with 1<sup>st</sup> derivative curve indicated.

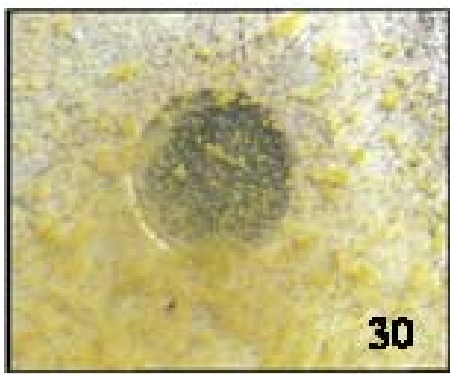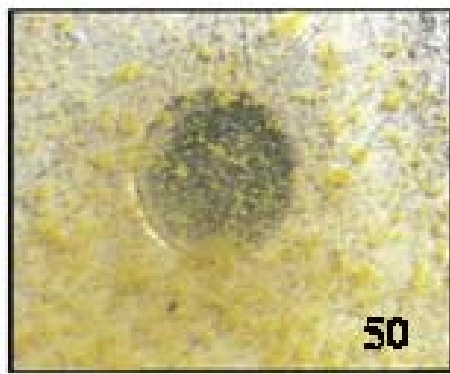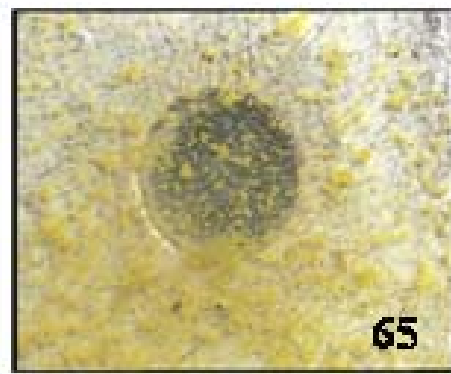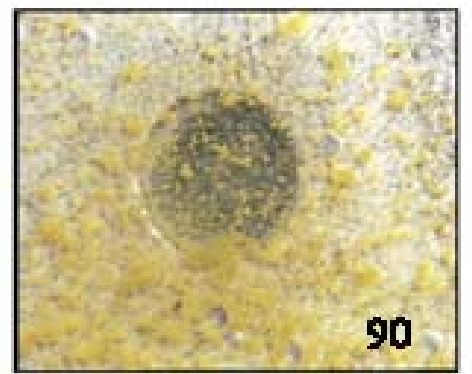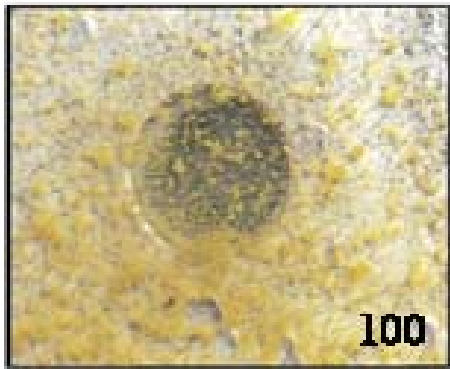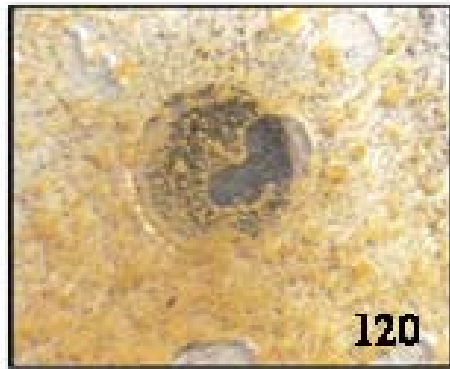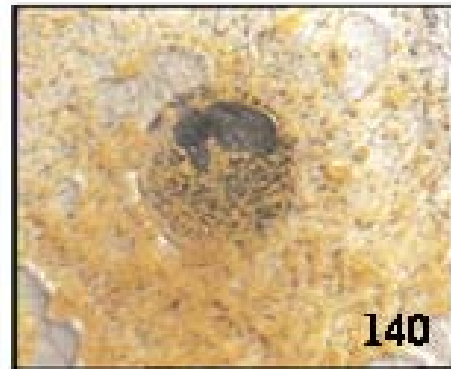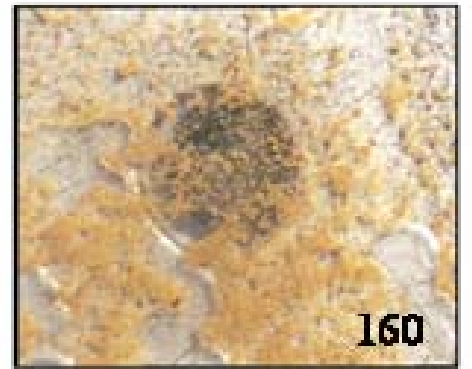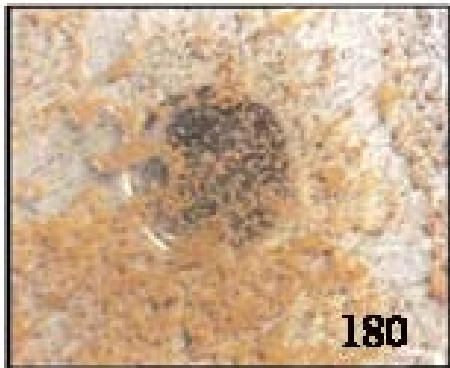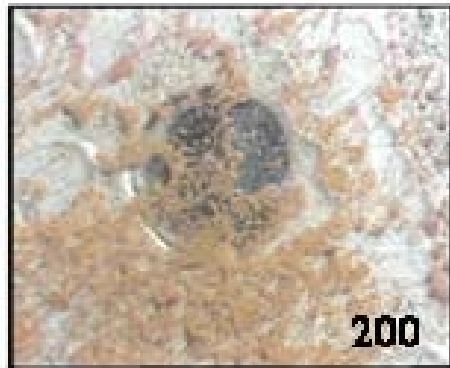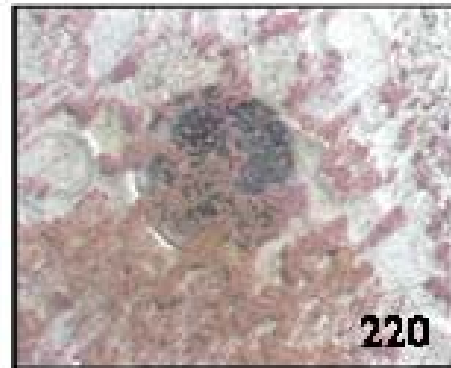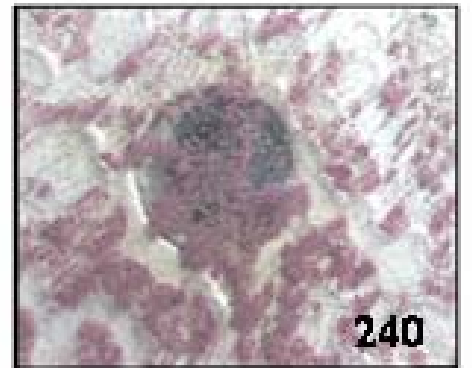

HSM photographs of **2** heated under silicone oil. Temperatures reported in degrees Celsius

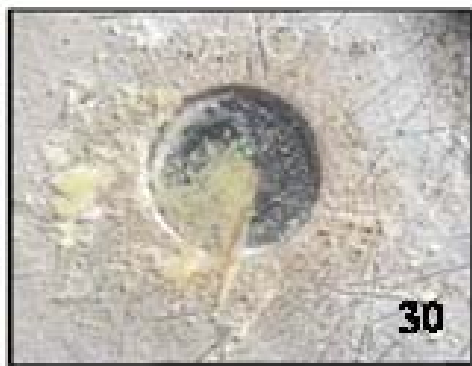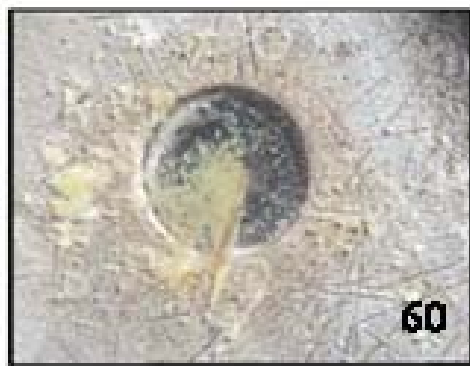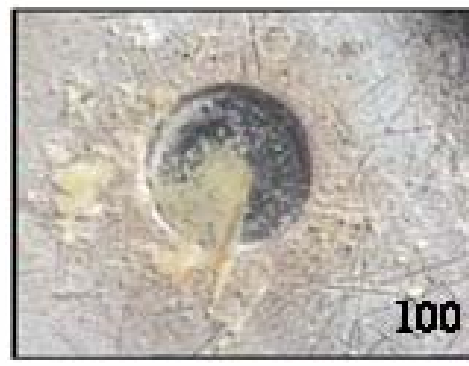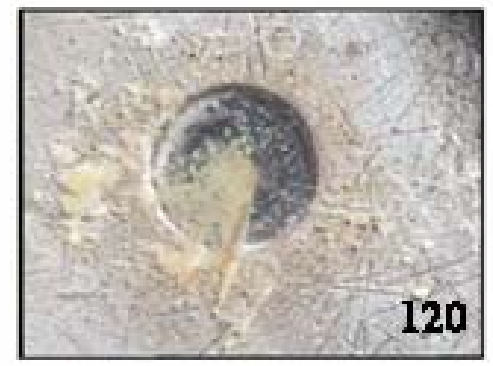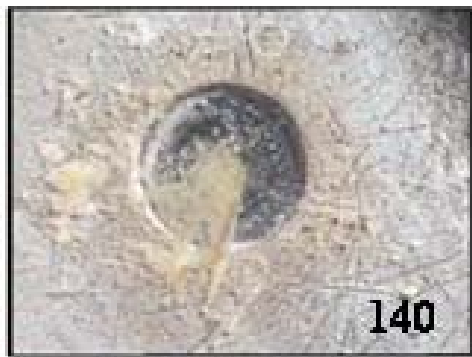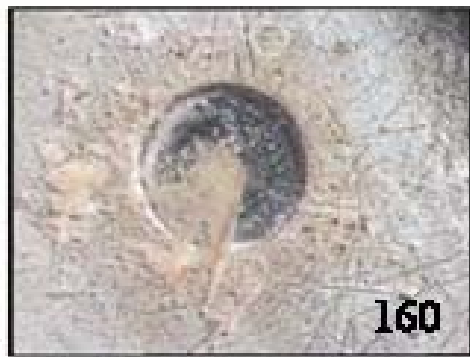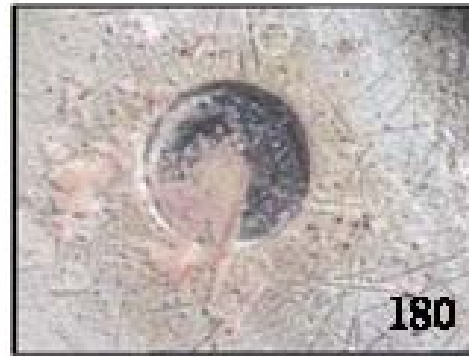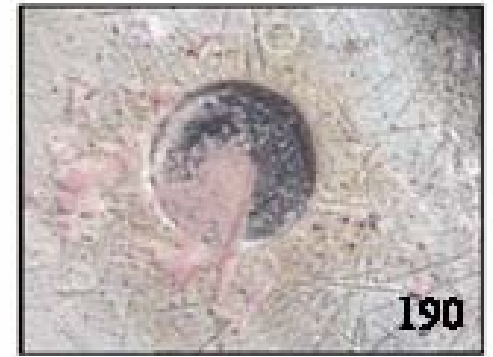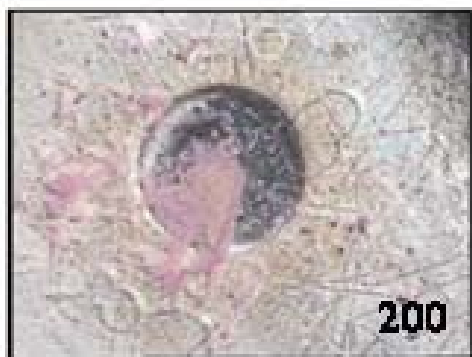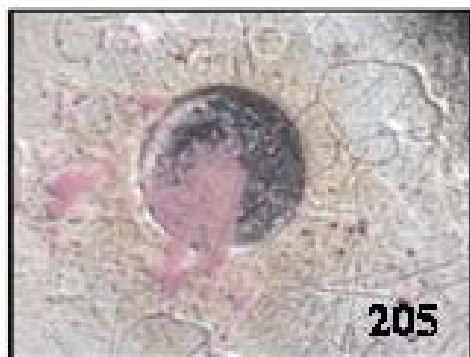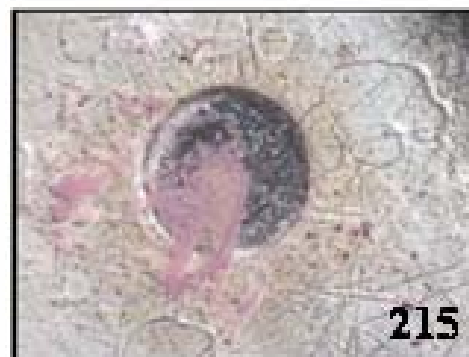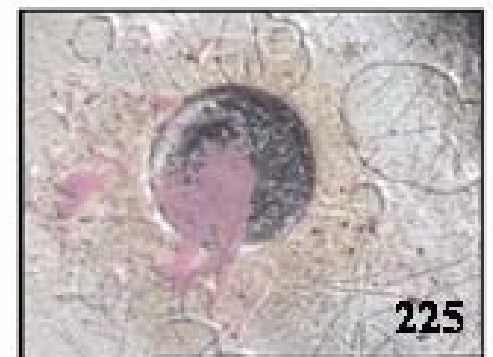

HSM photographs of **3** heated under silicone oil. Temperatures reported in degrees Celsius.

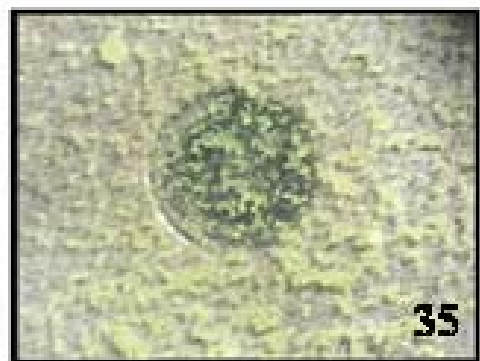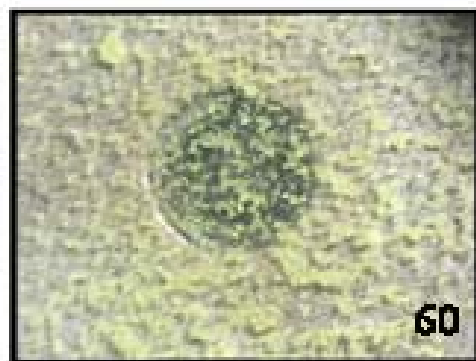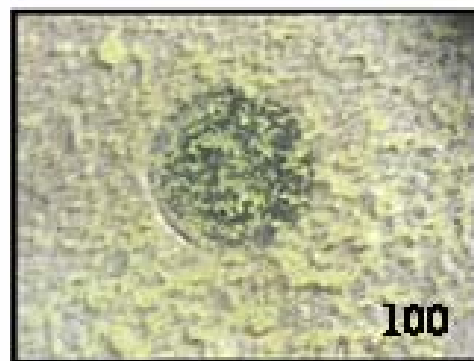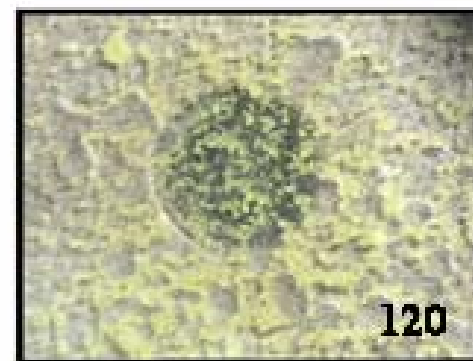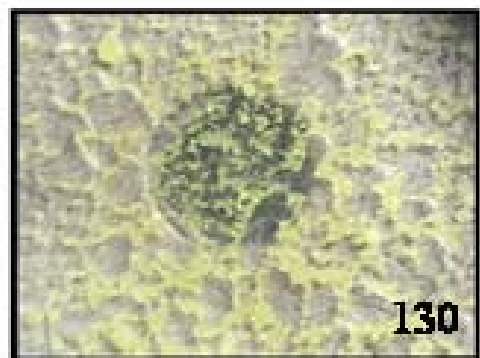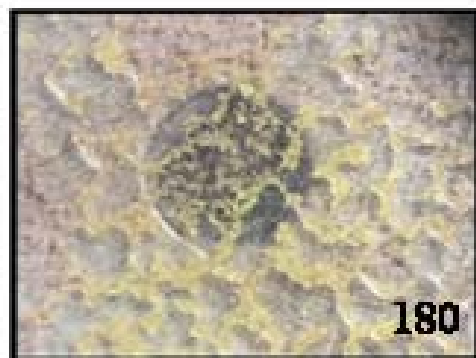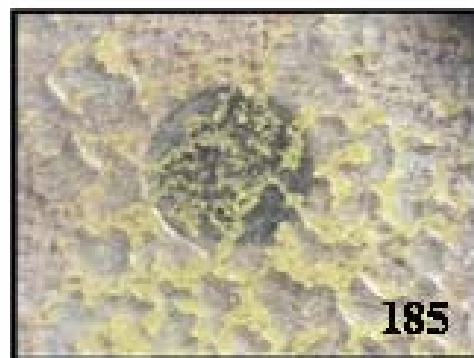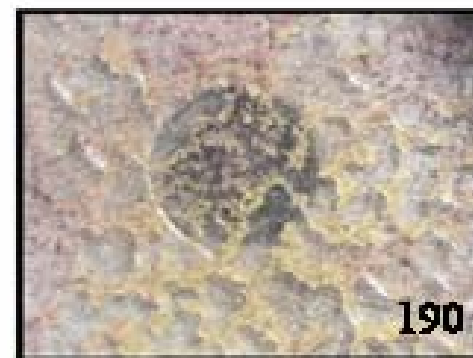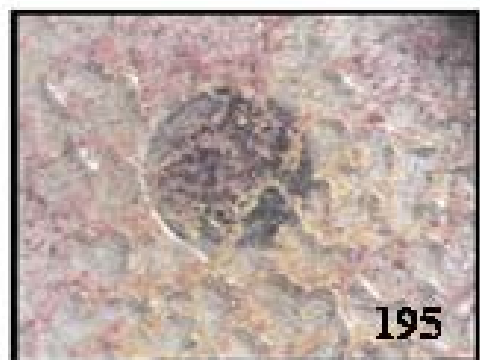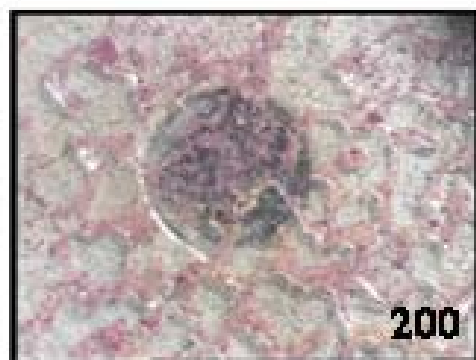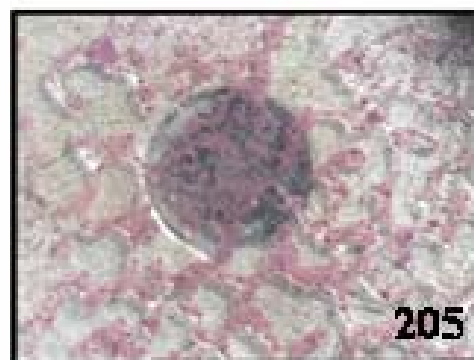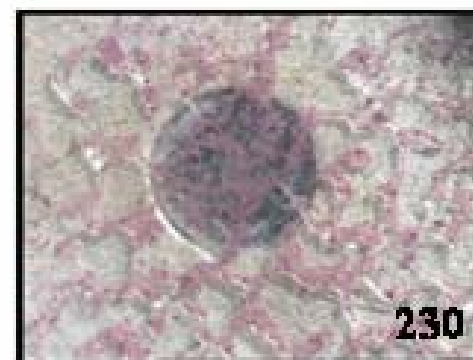

HSM photographs of **4** heated under silicone oil. Temperatures reported in degrees Celsius



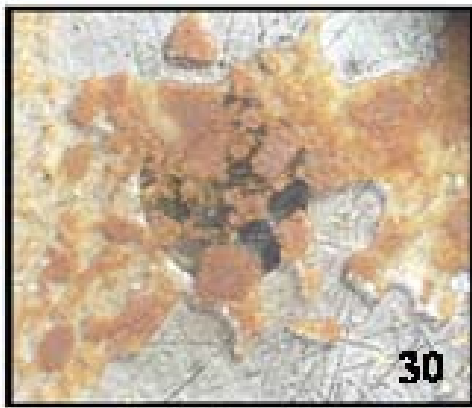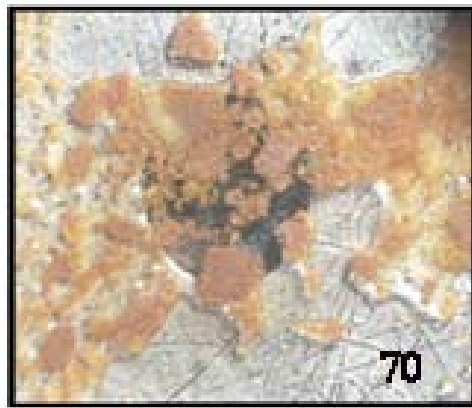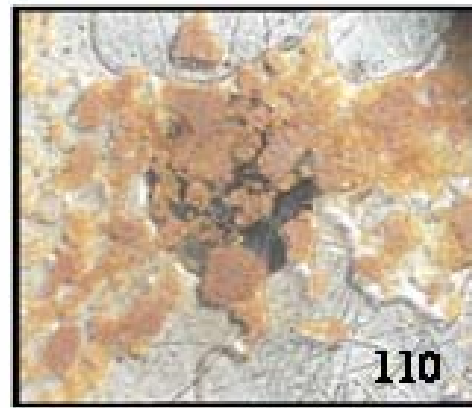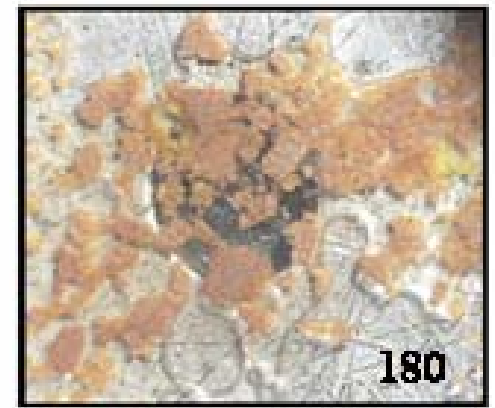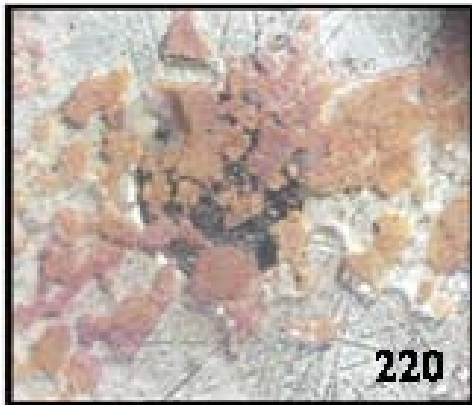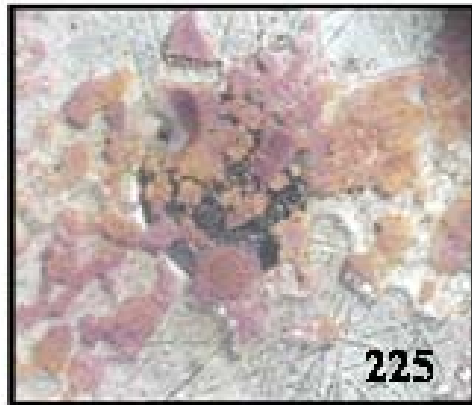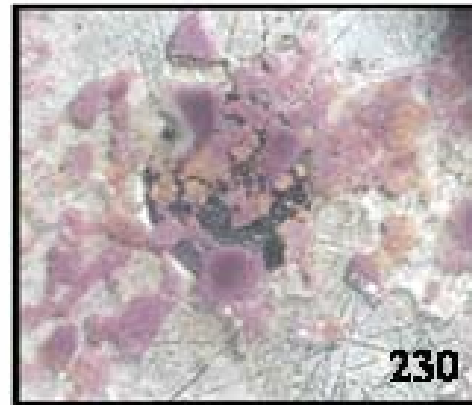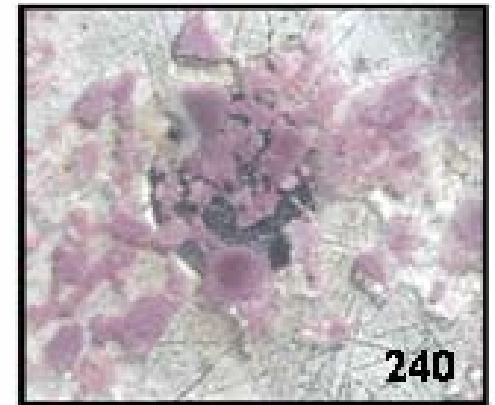

HSM photographs of **5** heated under silicone oil. Temperatures reported in degrees Celsius.

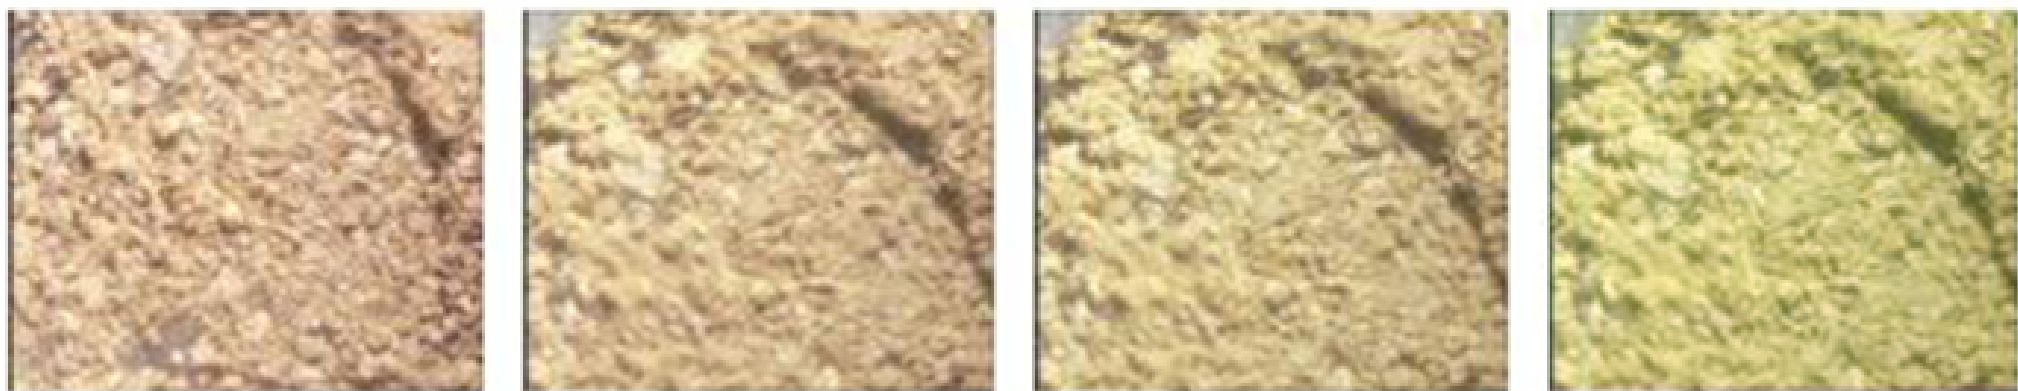

Digital photographs of a sample of  $\{cis-[Ni(I-Et-S,O)(DPE-N,N)]_2\}_n$  (**5**): (i) as a light orange powder prior initially, (ii) undergoing a colour change immediately upon enclosure in a  $CH_2Cl_2$  saturated chamber, (iii) substantially further in the transition in colour after ca. 5 seconds of exposure and (iv) in the final chromatic state as a pale green powder after 1 minute of exposure.

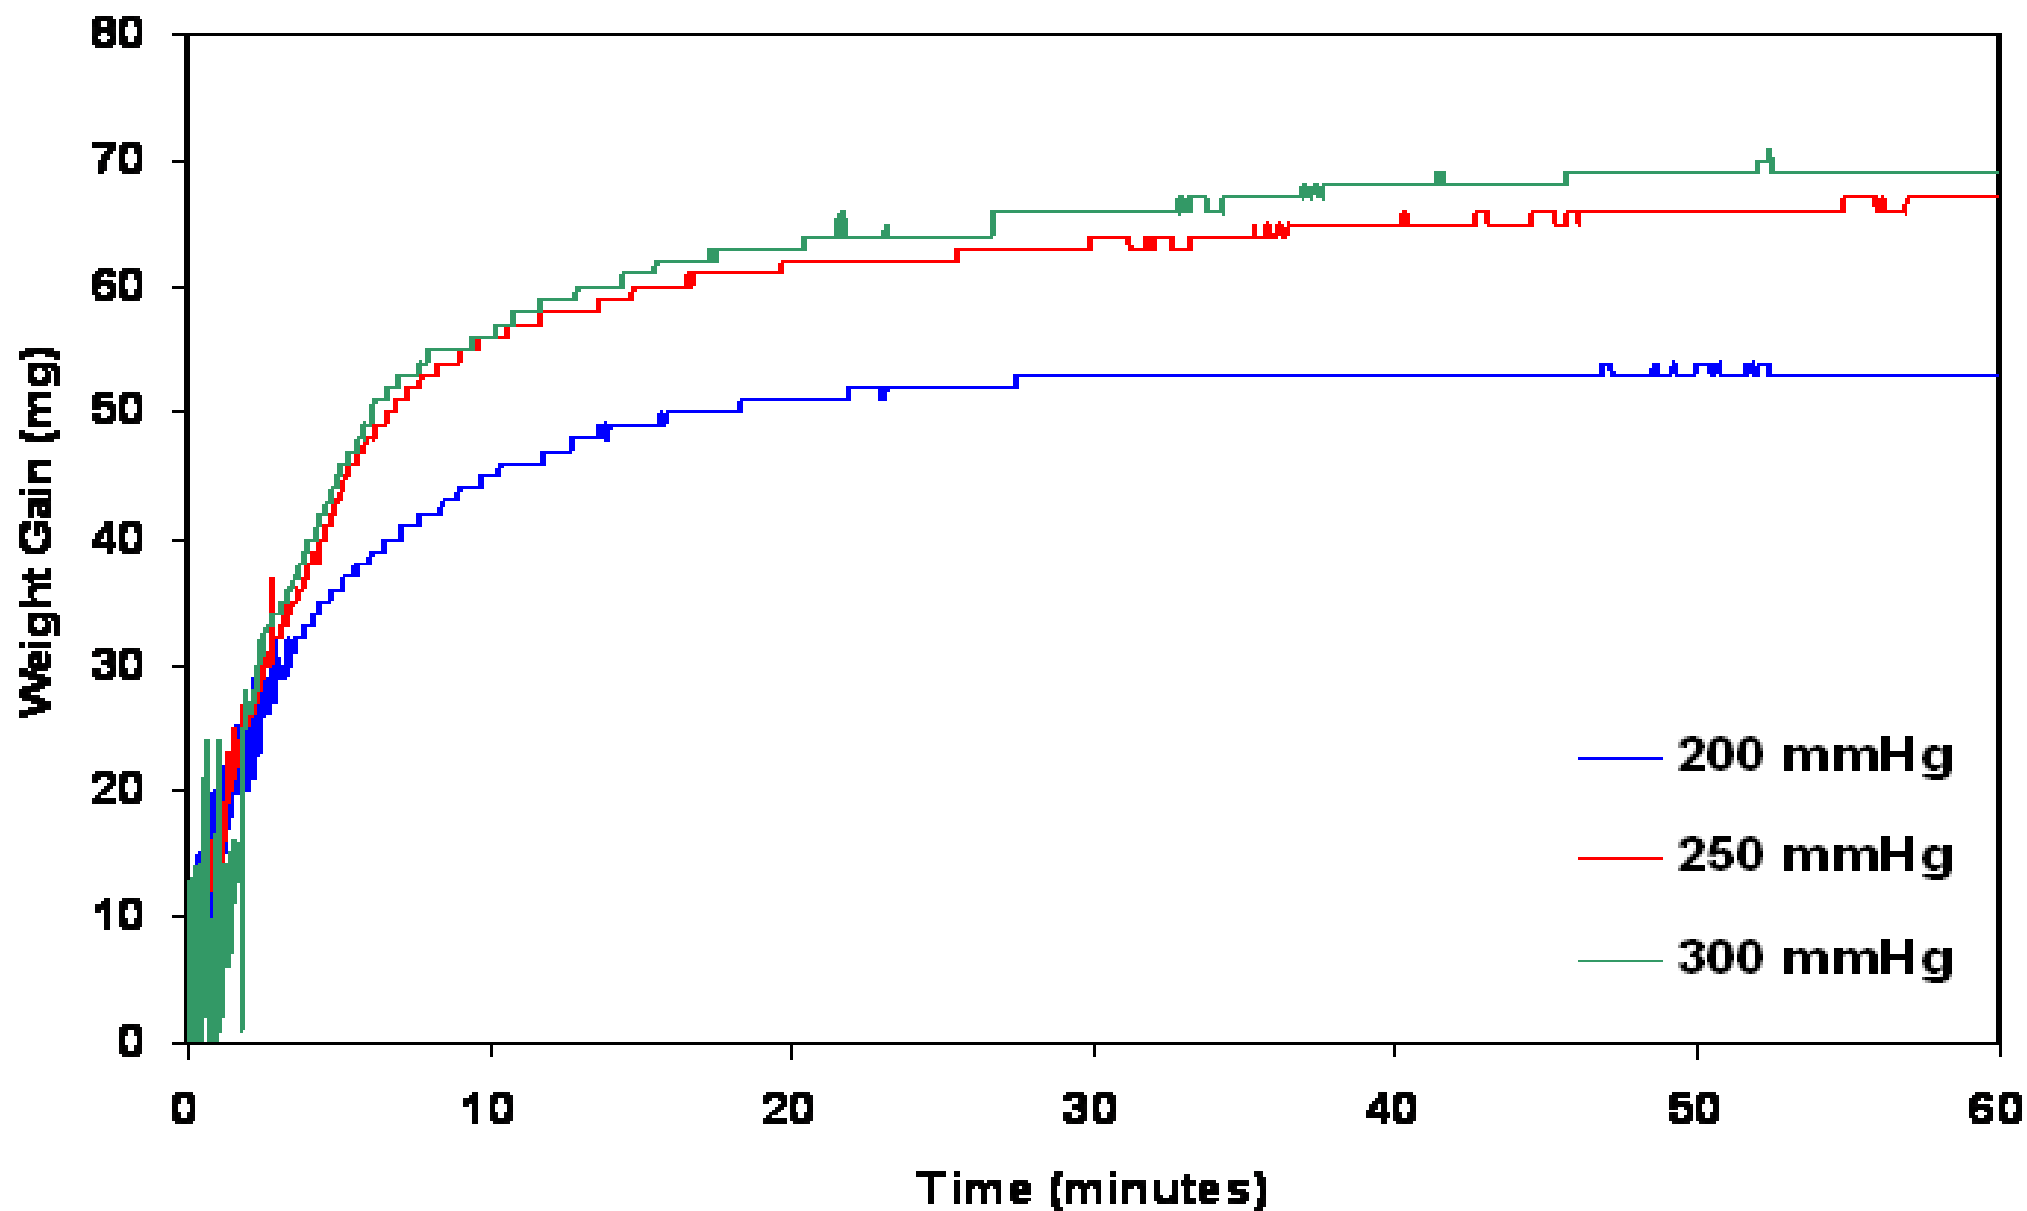

Results of gravimetric study of isobaric sorption of  $\text{CH}_2\text{Cl}_2$  by  $\{cis\text{-}[\text{Ni}(\text{I-Et-S,O})(\text{DPE-}M,N)]_2\}_n$  (**5**) performed on a levitating balance
